# Supplementary material
Source: HighWire-hosted journal article supplement (https://lupus.bmj.com/content/10/2/e000962)
Supplement: inline-supplementary-material-2 [file inline-supplementary-material-2.pdf]

Supplementary text

Supplementary figure legends

Supplementary Figure 1. Immunofluorescent study of IFN- $\alpha$  and CD123

IFN- $\alpha$  positive cells are also positive for CD123, indicative of plasmacytoid dendritic cells.
